# Supplementary material for: Study of Different Variants of Mo Enzyme crARC and the Interaction with Its Partners crCytb5-R and crCytb5-1
Source: PubMed Central journal article supplement (PMC5372681; doi:10.3390/ijms18030670), 2017-03-21
Supplement: ijms-18-00670-s001.pdf [file ijms-18-00670-s001.pdf]

**Table S1.** List of primers used.

|           | <b>Name</b> | <b>Primer 5'-3'</b>       | <b>Mutant</b> |
|-----------|-------------|---------------------------|---------------|
| <b>1</b>  | CrARCG17Af  | CATGTCGCGCTGTGTCCCTCC     | <b>G17A</b>   |
|           | CrARCG17Ar  | GAGGGACACAGCGCGACATGA     |               |
| <b>2</b>  | CrARCL139Af | CCCTGTCGCGCGGTGCGCT       | <b>L139A</b>  |
|           | CrARCL139Ar | AGCGCACCGCGCGACAGGG       |               |
| <b>3</b>  | CrARCD182Af | CTTCAGCGCCGGCTACCCCA      | <b>D182A</b>  |
|           | CrARCD182Ar | ATGGGGTAGCCGGCGCTGAAG     |               |
| <b>4</b>  | CrARCF210Af | AACCGCGCCCGGCCCAACA       | <b>F210A</b>  |
|           | CrARCF210Ar | TGTTGGGCGCGGCGCGGTT       |               |
| <b>5</b>  | CrARCR211Af | AACCGCTTCGCGCCCAACA       | <b>R211A</b>  |
|           | CrARCR211Ar | TGTTGGGCGCGAAGCGGTT       |               |
| <b>6</b>  | CrARCN213Af | GCTTCCGGCCCGCCATTGAGGT    | <b>N213A</b>  |
|           | CrARCN213Ar | ACCTCAATGGCGGGCCGGAAGC    |               |
| <b>7</b>  | CrARCE224Af | CCTGGGCTGCGGACACCTGGC     | <b>E224A</b>  |
|           | CrARCE224Ar | CGCCAGGTGTCCGCAGCCCAG     |               |
| <b>8</b>  | CrARCD225Af | CCTGGGCTGAGGCCACCTGGC     | <b>D225A</b>  |
|           | CrARCD225Ar | CGCCAGGTGGCCTCAGCCCAG     |               |
| <b>9</b>  | CrARCE267Af | GGCGATGCGCCGCTGGACA       | <b>E267A</b>  |
|           | CrARCE267Ar | TGTGTCCAGCGGCGCATCGC      |               |
| <b>10</b> | CrARCP268Af | GGCGATGAGGCGCTGGACA       | <b>P268A</b>  |
|           | CrARCP268Ar | TGTGTCCAGCGCCTCATCGC      |               |
| <b>11</b> | CrARCL272Af | CTGGACACAGCGGGAGAGTTCAGGA | <b>L272A</b>  |
|           | CrARCL272Ar | GTCCTGAACTCTCCCGCTGTGTCCA |               |
| <b>12</b> | CrARCR276Af | GAGAGTTCGCGACGGGCAAGGTG   | <b>R276A</b>  |
|           | CrARCR276Ar | CACCTTGCCCGTCGCGAACTCTC   |               |
